# Supplementary material for: Associations between microRNA binding site SNPs in FGFs and FGFRs and the risk of non-syndromic orofacial cleft
Source: PubMed Central journal article supplement (PMC4980626; doi:10.1038/srep31054), 2016-08-11
Supplement: srep31054-s1.pdf [file srep31054-s1.pdf]

**Associations between microRNA binding site SNPs in *FGFs* and *FGFRs* and the risk of non-syndromic orofacial cleft**

Dandan Li<sup>1,2</sup>, Hongchuang Zhang<sup>3</sup>, Lan Ma<sup>1,2</sup>, Yue Han<sup>1,2</sup>, Min Xu<sup>1,2</sup>, Zhendong Wang<sup>1,2</sup>, Hongbing Jiang<sup>1,2</sup>, Weibing Zhang<sup>1,2</sup>,  
Yongchu Pan<sup>1,2\*</sup>, Lin Wang<sup>1,2\*</sup>

1 Institute of Stomatology, Nanjing Medical University, Nanjing, 210029, China,

2 Jiangsu Key Laboratory of Oral Diseases, Nanjing Medical University, Nanjing, 210029, China

3 Xuzhou First People's Hospital, Xuzhou, 221000, China

\*Corresponding authors, [nydwlktz@gmail.com](mailto:nydwlktz@gmail.com) (LW) and [panyongchu@njmu.edu.cn](mailto:panyongchu@njmu.edu.cn) (YP)

**Table S1.** Demographic characteristic information of cases and controls

| Variables        | Cases (N=602)  |      | Controls (N=605) |      |
|------------------|----------------|------|------------------|------|
|                  | N              | %    | N                | %    |
| Age <sup>a</sup> | 1.0 (0.5, 3.0) | -    | 9.1(8.7, 9.7)    | -    |
| Gender           |                |      |                  |      |
| Male             | 372            | 61.8 | 362              | 60.1 |
| Female           | 230            | 38.2 | 243              | 39.9 |
| Subgroups        |                |      |                  |      |
| CLO              | 238            | 39.5 |                  |      |
| CLP              | 305            | 50.6 |                  |      |
| CPO              | 56             | 9.3  |                  |      |

CLO, cleft lip only; CLP, cleft lip and palate; CPO, cleft palate only

<sup>a</sup> Median (Percentiles 25, Percentiles 75)

**Table S2.** Stratified distribution of study subjects by subtypes of deformity

| Genotype         | Controls<br>(n=593, %) | CLO<br>(n=232, %) | CLP<br>(n=289, %) | CPO<br>(n=49, %) |
|------------------|------------------------|-------------------|-------------------|------------------|
| <b>rs1048201</b> |                        |                   |                   |                  |
| CC               | 158 (26.6)             | 81 (34.9)         | 96 (33.2)         | 16 (32.7)        |
| CT               | 310 (52.3)             | 110 (47.4)        | 134 (46.4)        | 25 (51.0)        |
| TT               | 125 (21.1)             | 41 (17.7)         | 59 (20.4)         | 8 (16.3)         |
| <b>rs3733336</b> |                        |                   |                   |                  |
| AA               | 308 (52.2)             | 139 (59.9)        | 170 (58.8)        | 34 (69.4)        |
| GA               | 246 (41.7)             | 86 (37.1)         | 105 (36.3)        | 14 (28.6)        |
| GG               | 39 (6.6)               | 7 (3.0)           | 14 (4.8)          | 1 (2.0)          |
| <b>rs546782</b>  |                        |                   |                   |                  |
| AA               | 558 (94.1)             | 223 (96.1)        | 278 (96.2)        | 49 (100.0)       |
| AT               | 34 (5.7)               | 9 (3.9)           | 11 (3.8)          | 0 (0.0)          |
| TT               | 1 (0.2)                | 0 (0.0)           | 0 (0.0)           | 0 (0.0)          |

CLO, cleft lip only; CLP, cleft lip and palate; CPO: cleft palate only

**Table S3.** Stratified analysis by subtypes of deformity

| Phenotype | Analysis model                       | rs1048201               |              | rs3733336               |              | rs546782         |          |
|-----------|--------------------------------------|-------------------------|--------------|-------------------------|--------------|------------------|----------|
|           |                                      | OR (95% CI)             | <i>P</i>     | OR (95% CI)             | <i>P</i>     | OR (95% CI)      | <i>P</i> |
| CLO       |                                      |                         |              |                         |              |                  |          |
|           | Allelic comparison <sup>a</sup>      | <b>0.78 (0.63-0.97)</b> | <b>0.028</b> | <b>0.70 (0.53-0.92)</b> | <b>0.010</b> | 0.65 (0.31-1.35) | 0.254    |
|           | Heterozygous comparison <sup>b</sup> | <b>0.69 (0.49-0.98)</b> | <b>0.038</b> | 0.77 (0.56-1.06)        | 0.105        | 0.63 (0.32-1.44) | 0.311    |
|           | Homozygous comparison <sup>c</sup>   | <b>0.63 (0.40-0.99)</b> | <b>0.043</b> | <b>0.39 (0.17-0.91)</b> | <b>0.028</b> | —                | 0.982    |
|           | Additive model                       | <b>0.78 (0.63-0.97)</b> | <b>0.028</b> | <b>0.71 (0.55-0.93)</b> | <b>0.012</b> | 0.65 (0.31-1.36) | 0.255    |
| CLP       |                                      |                         |              |                         |              |                  |          |
|           | Allelic comparison <sup>a</sup>      | 0.88 (0.72-1.07)        | 0.172        | 0.79 (0.62-1.00)        | 0.053        | 0.61 (0.30-1.19) | 0.142    |
|           | Heterozygous comparison <sup>b</sup> | <b>0.72 (0.52-0.99)</b> | <b>0.046</b> | 0.78 (0.58-1.05)        | 0.100        | 0.63 (0.31-1.26) | 0.187    |
|           | Homozygous comparison <sup>c</sup>   | 0.79 (0.53-1.18)        | 0.248        | 0.65 (0.34-1.23)        | 0.181        | —                | 0.981    |
|           | Additive model                       | 0.87 (0.71-1.06)        | 0.170        | 0.79 (0.62-1.00)        | 0.053        | 0.60 (0.30-1.19) | 0.142    |
| CPO       |                                      |                         |              |                         |              |                  |          |
|           | Allelic comparison <sup>a</sup>      | 0.79 (0.52-1.22)        | 0.286        | <b>0.50 (0.29-0.88)</b> | <b>0.017</b> | —                | —        |
|           | Heterozygous comparison <sup>b</sup> | 0.79 (0.41-1.52)        | 0.479        | <b>0.51 (0.27-0.98)</b> | <b>0.043</b> | —                | —        |
|           | Homozygous comparison <sup>c</sup>   | 0.63 (0.26-1.53)        | 0.309        | 0.23 (0.03-1.71)        | 0.150        | —                | —        |
|           | Additive model                       | 0.79 (0.52-1.22)        | 0.286        | <b>0.50 (0.29-0.88)</b> | <b>0.017</b> | —                | —        |

CLO, cleft lip only; CLP, cleft lip and palate; CPO, cleft palate only

<sup>a</sup> Allelic comparison; rs1048201- T vs. C, rs3733336- G vs. A, rs546782-T vs. A

<sup>b</sup> Heterozygous comparison; rs1048201 - CT vs. CC, rs3733336 - AG vs. AA, rs546782 - AT vs. AA.

<sup>c</sup> Homozygous comparison; rs1048201 - TT vs. CC, rs3733336 - GG vs. AA, rs546782-TT vs. AA.

**Table S4.** Multinomial logistic regression of deformity subtypes with additive model.

| Phenotype | rs1048201               |              | rs3733336               |              | rs546782         |          |
|-----------|-------------------------|--------------|-------------------------|--------------|------------------|----------|
|           | OR (95% CI)             | <i>P</i>     | OR (95% CI)             | <i>P</i>     | OR (95% CI)      | <i>P</i> |
| CLO       | <b>0.78 (0.63-0.97)</b> | <b>0.028</b> | <b>0.71 (0.55-0.93)</b> | <b>0.012</b> | 0.62 (0.29-1.28) | 0.196    |
| CLP       | 0.85 (0.70-1.04)        | 0.115        | <b>0.77 (0.60-0.97)</b> | <b>0.027</b> | 0.64 (0.33-1.24) | 0.185    |
| CPO       | 0.93 (0.62-1.39)        | 0.723        | <b>0.50 (0.29-0.88)</b> | <b>0.013</b> | —                | —        |

CLO, cleft lip only; CLP, cleft lip and palate; CPO, cleft palate only

**Table S5.** Combined effect of three SNPs in three subtypes

| Protective allele number <sup>a</sup> | CLO                     |              | CLP                     |              | CPO                     |              |
|---------------------------------------|-------------------------|--------------|-------------------------|--------------|-------------------------|--------------|
|                                       | OR (95%CI) <sup>a</sup> | <i>P</i>     | OR (95%CI) <sup>a</sup> | <i>P</i>     | OR (95%CI) <sup>a</sup> | <i>P</i>     |
| 0                                     | Reference               |              | Reference               |              | Reference               |              |
| 1                                     | 0.86 (0.55-1.35)        | 0.523        | <b>0.56 (0.37-0.85)</b> | <b>0.006</b> | 0.53 (0.25-1.11)        | 0.094        |
| 2                                     | <b>0.59 (0.37-0.94)</b> | <b>0.028</b> | <b>0.51 (0.33-0.77)</b> | <b>0.001</b> | <b>0.37 (0.16-0.83)</b> | <b>0.015</b> |
| 3-6                                   | <b>0.43 (0.24-0.79)</b> | <b>0.007</b> | <b>0.55 (0.33-0.91)</b> | <b>0.019</b> | <b>0.27 (0.08-0.85)</b> | <b>0.025</b> |
| 1-6                                   | 0.68 (0.45-1.02)        | 0.064        | <b>0.54 (0.37-0.78)</b> | <b>0.001</b> | <b>0.42 (0.21-0.82)</b> | <b>0.010</b> |
| <i>P</i> <sup>b</sup>                 | <b>0.048</b>            |              | <b>0.001</b>            |              | 0.538                   |              |
| 2 vs. 1                               | 0.78 (0.59-1.03)        | 0.083        | 0.68 (0.47-1.00)        | 0.050        | 0.70 (0.34-1.45)        | 0.334        |
| 3-6 vs. 2                             | 0.91 (0.62-1.33)        | 0.653        | 0.72 (0.41-1.25)        | 0.248        | 0.73 (0.23-2.29)        | 0.585        |
| 3-6 vs. 1                             | 0.71 (0.49-1.04)        | 0.081        | <b>0.49 (0.29-0.83)</b> | <b>0.008</b> | 0.51 (0.17-1.53)        | 0.228        |

<sup>a</sup> rs1048201-T, rs3733336-G and rs546782-T were assumed as protective alleles based on the association study in Table 2.

<sup>b</sup> *P* value of multi degree-of-freedom likelihood ratio test.

**Table S6.** Primers of microRNAs for quantitative PCR

| <b>Gene Name</b> | <b>Forward (5'-3')</b>         | <b>Reverse (5'-3')</b> |
|------------------|--------------------------------|------------------------|
| miR-496          | ACACTCCAGCTGGGTGAGTATTACATGGCC | TGGTGTCGTGGAGTCG       |
| miR-23a          | ACACTCCAGCTGGGATCACATTGCCAGGG  | TGGTGTCGTGGAGTCG       |
| miR-145          | ACACTCCAGCTGGGGUCCAGUUUCCCAGGA | TGGTGTCGTGGAGTCG       |
| miR-187          | ACACTCCAGCTGGGTCGTGTCTTGTGTTGC | TGGTGTCGTGGAGTCG       |
| <i>U6</i>        | CTCGCTTCGGCAGCACA              | AACGCTTCACGAATTTGCGT   |
| <i>FGF2</i>      | AGAAGAGCGACCCTCACATCA          | CGGTTAGCACACACTCCTTTG  |
| <i>FGF5</i>      | CACTGATAGGAACCCTAGAGGC         | CAGATGGAAACCGATGCCC    |
| <i>FGF9</i>      | GGCCTGGTCAGCATTCGAG            | GTATCGCCTTCCAGTGTCCAC  |
| <i>GAPDH</i>     | GCACCGTCAAGGCTGAGAAC           | TGGTGAAGACGCCAGTGGA    |

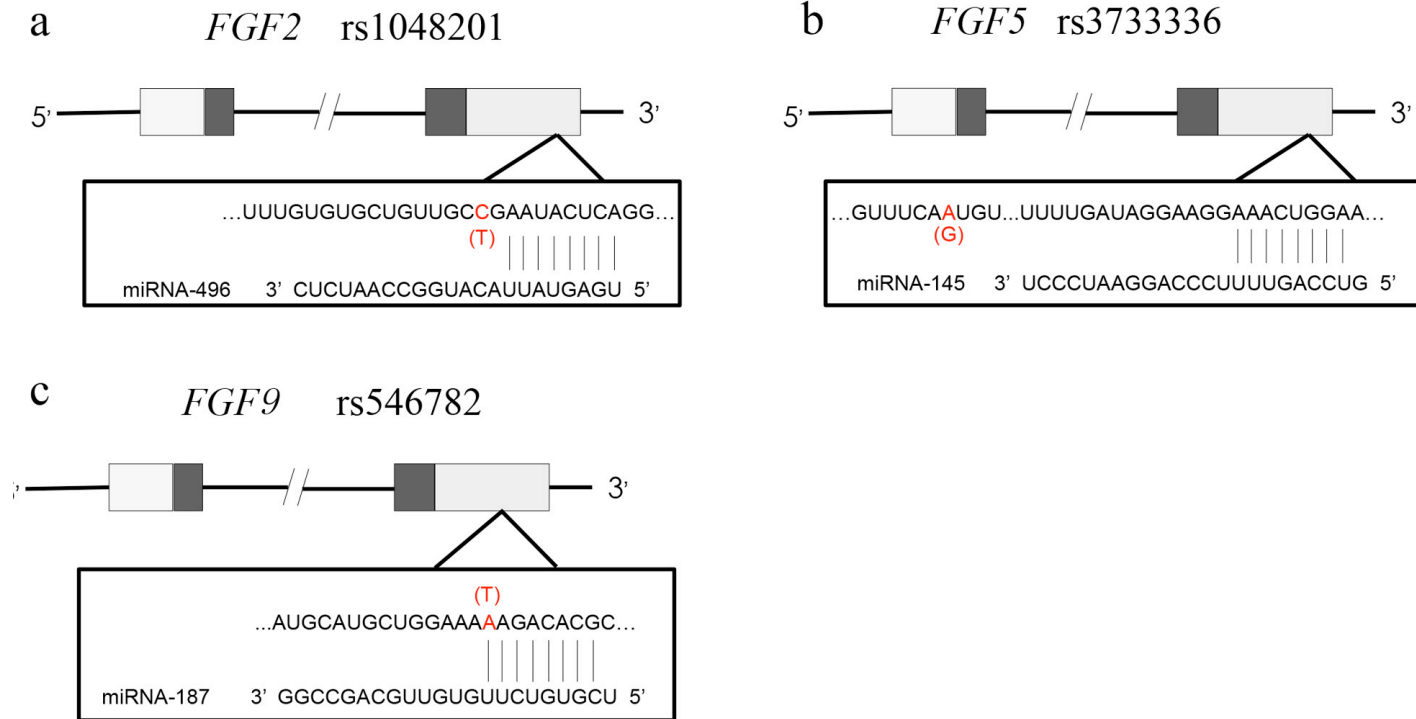

**Figure S1.** The presumed miRNA binding sequences.  
 (a) The putative binding of miR-496 and *FGF2* mRNA.  
 (b) The putative binding of miR-145 and *FGF5* mRNA.  
 (c) The putative binding of miR-187 and *FGF9* mRNA.



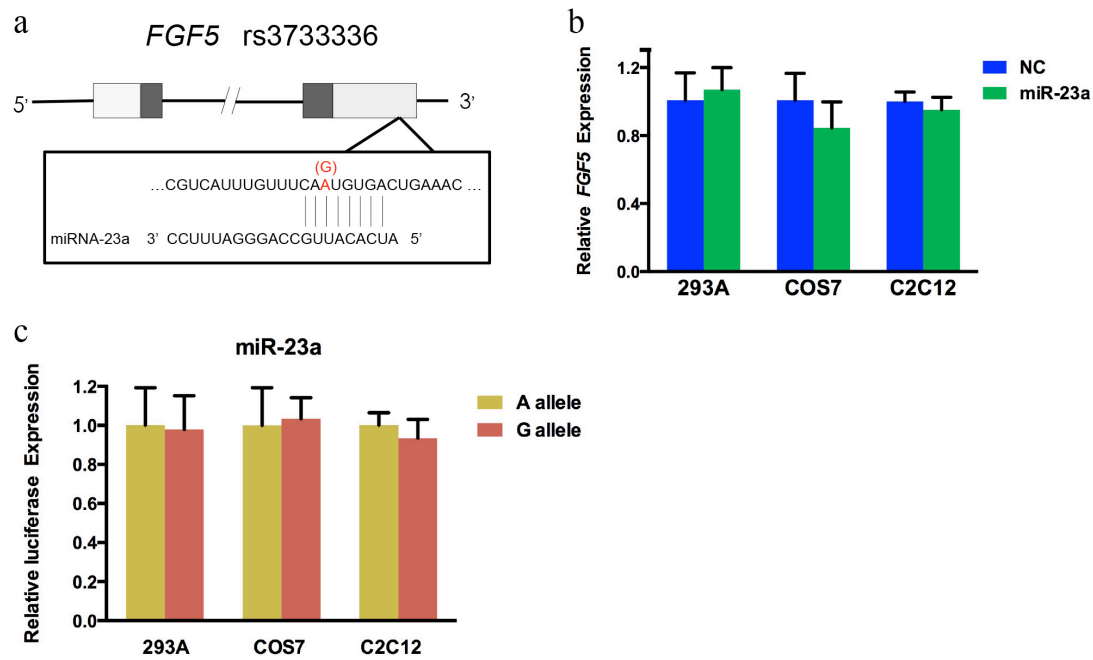

**Figure S2.** The binding ability test of miR-23a and 3'-UTR of *FGF5*.

miR-23a was predicted to have the binding ability with *FGF5* mRNA (**Figure S2, a**). However, *FGF5* expression was not affected by miR-23a mimics in all kinds of cells (**Supplementary Figure S2, b**). At the same time, rs3733336 was unable to affect miR-23a and *FGF5* interaction regarding the similar luciferase expressions between two alleles (**Supplementary Figure S2, c**). Therefore, miR-23a was demonstrated to not bind *FGF5* as predicted.

(a) The putative binding of miR-23a and *FGF5* mRNA.

(b) *FGF5* expression levels in HEK-293A cells, COS7 cells and C2C12 cells transfected with miR-23a mimics and nonsense RNA fragments (NC) respectively.

(c) Binding ability assay of plasmids construct with 3'-UTR fragment of *FGF5* and miR-23a in HEK-293A cells, COS7 cells and C2C12 cells. Ratio of Firefly luciferase to *Renilla* luciferase was considered as relative luciferase expression. Independent triplicate experiments were performed.

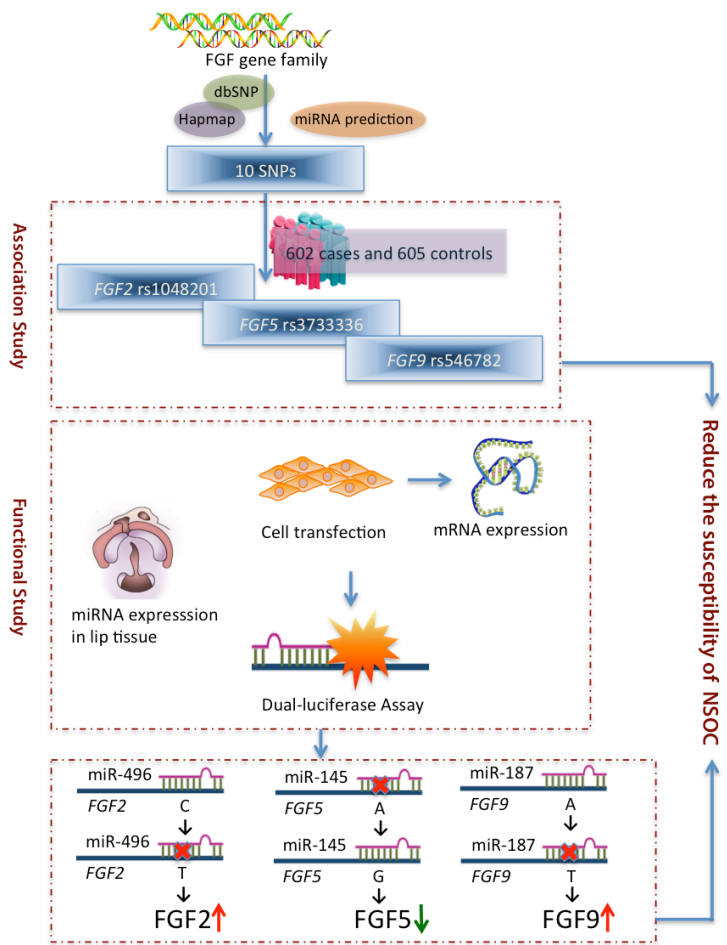

**Figure S3.** Sketch map of the experiment process.

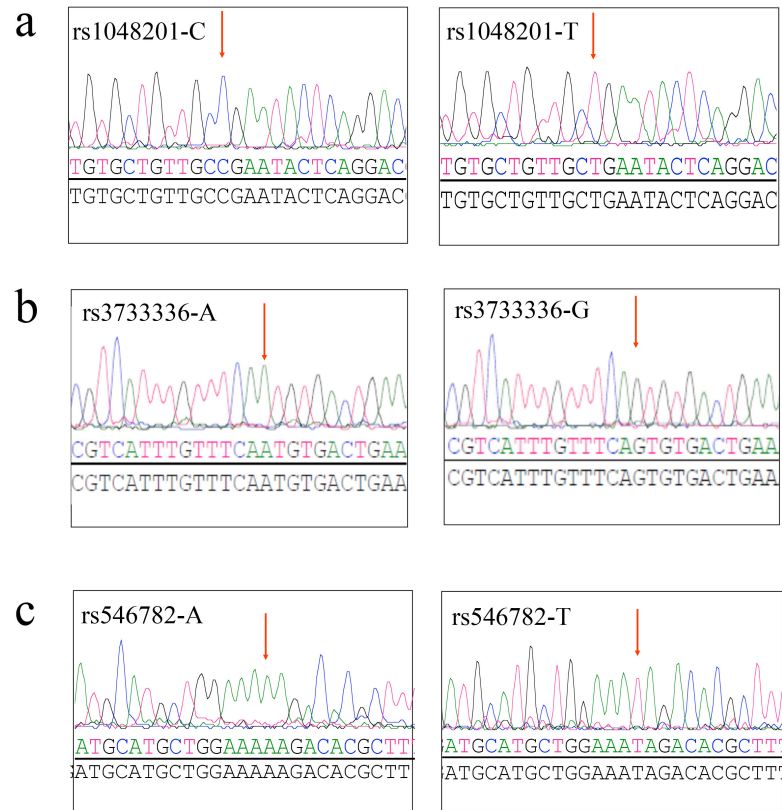

**Figure S4.** Diagram of three fragments and the mutations

(a) Result of sequencing showed that 3'-UTR fragment containing rs1048201 C allele or T allele was successfully synthesized and inserted into psiCHECK<sup>TM</sup>-2 vector.

(b) 3'-UTR fragment of *FGF5* containing A allele or G allele of rs3733336.

(c) 3'-UTR fragment of *FGF9* containing A allele or T allele of rs546782.
